# Supplementary material for: Exploring how groundwater buffers the influence of heatwaves on vegetation function during multi-year droughts
Source: Copernicus journal article supplement (doi:10.5194/esd-2021-31), 2021-05-06
Supplement: Supplementary file 1 [file esd-2021-31-supplement.pdf]

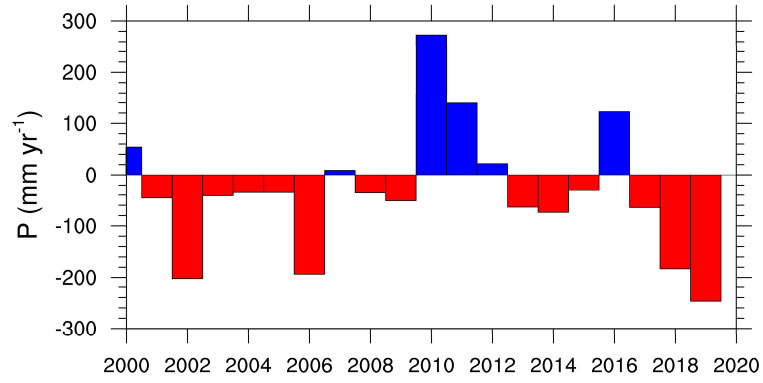

**Fig S1** annual precipitation anomaly (P) from 2000 to 2019 over S.E. Australia. The anomalies were calculated relative to the 1970-2019 climatology.

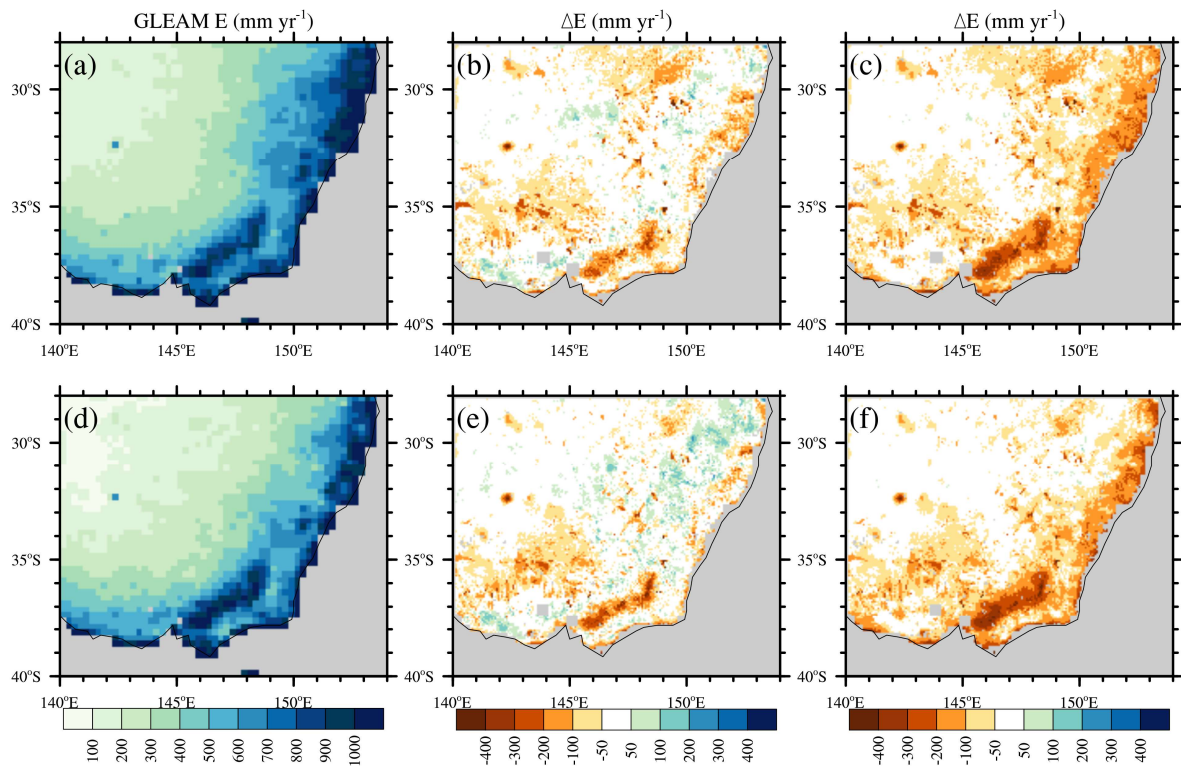

**Fig S2** Annual evaporation (E). (a)-(c) are for Millennium drought, and (d)-(f) are for the recent drought. (a) and (d) are E in GLEAM; (b) and (e) are  $\Delta E$  between GW and GLEAM; (c) and (f) are  $\Delta E$  between FD and GLEAM.

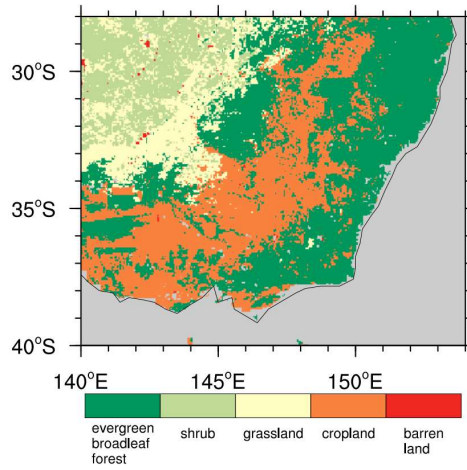

**Fig. S3.** Distribution of CABLE plant functional types over S.E. Australia.

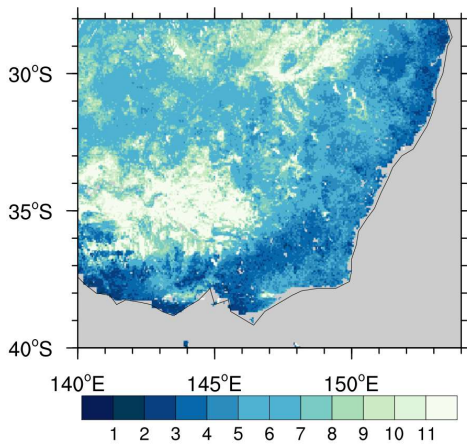

**Fig S4** The mean water table depth (m) during 2017-2019 from the GW experiment.

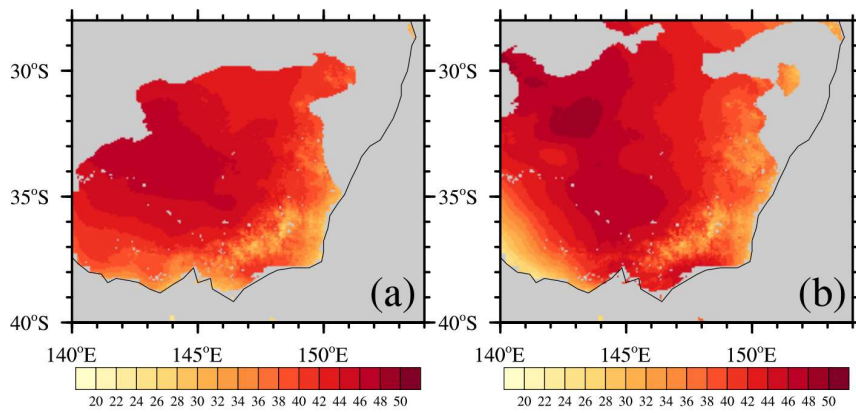

**Fig S5.** Maximum air temperature (°C) over the heatwave regions on (a) 15<sup>th</sup> and (b) 25<sup>th</sup> Jan 2019.

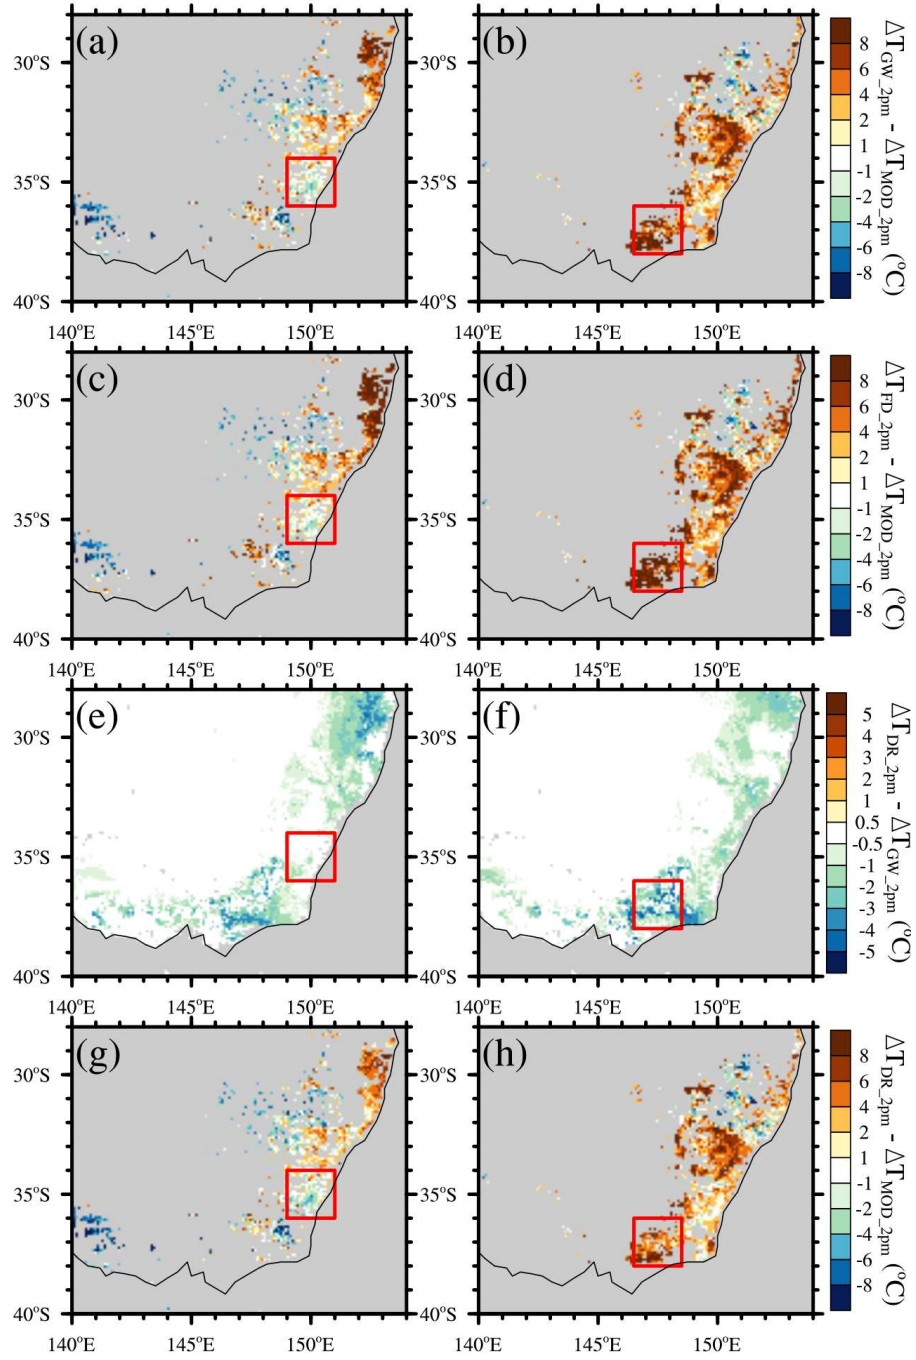

**Fig S6.** The difference of  $\Delta T$  at 2pm between (a)-(b) GW and MODIS LST ( $\Delta T_{GW\_2pm} - \Delta T_{MOD\_2pm}$ ), (c)-(d) FD and MODIS LST ( $\Delta T_{FD\_2pm} - \Delta T_{MOD\_2pm}$ ), (e)-(f) DR and GW ( $\Delta T_{DR\_2pm} - \Delta T_{GW\_2pm}$ ), and (g)-(h) DR and MODIS LST ( $\Delta T_{DR\_2pm} - \Delta T_{MOD\_2pm}$ ). The left column is for 15<sup>th</sup> and the right is for 25<sup>th</sup> Jan 2019.

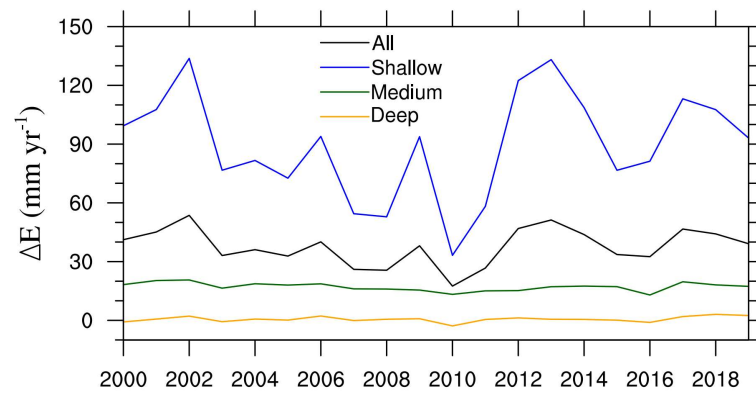

**Fig S7.** The time series of the difference in E between GW and FD ( $\Delta E$ ) over S.E. Australia. The lines show the mean  $\Delta E$  over S.E. Australia (black), shallow WTD regions ( $< 5\text{m}$ ; blue); medium WTD regions ( $5\sim 10\text{m}$ ; green) and deep WTD region ( $> 10\text{m}$ ; orange).
